# Supplementary material for: Rational design of benzodifuran-functionalized donor–acceptor covalent organic frameworks for photocatalytic hydrogen evolution from water
Source: Royal Society of Chemistry journal article supplement (doi:10.1039/d1cc00854d), 2021-01-01
Supplement: d1cc00854d1.pdf [file d1cc00854d1.pdf]

## Supporting Information for

### **Rational design of benzodifuran-functionalized donor-acceptor covalent organic framework for photocatalytic hydrogen evolution from water**

Guang-Bo Wang,<sup>†</sup> Fu-Cheng Zhu,<sup>†</sup> Qian-Qian Lin, Jing-Lan Kan, Ke-Hui Xie, Sha Li, Yan Geng\* and Yu-Bin Dong\*

College of Chemistry, Chemical Engineering and Materials Science, Collaborative Innovation Center of Functionalized Probes for Chemical Imaging in Universities of Shandong, Key Laboratory of Molecular and Nano Probes, Ministry of Education, Shandong Normal University, Jinan 250014, P. R. China.

<sup>†</sup> These authors contributed equally to this work.

Corresponding Authors: Y.-B. Dong, [yubindong@sdu.edu.cn](mailto:yubindong@sdu.edu.cn)  
Y. Geng, [gengyan@sdu.edu.cn](mailto:gengyan@sdu.edu.cn)

#### **Materials and methods**

**Materials.** All the reagents were purchased from commercial suppliers and used without further purification unless otherwise noted. The building unit of 4,4'-(benzo[1,2-b:4,5-b']difuran-4,8-diyl)dibenzaldehyde was synthesized according to the previously reported procedures.<sup>1</sup>

**Characterizations.**  $^1\text{H}$  NMR spectra were recorded on a Bruker Avance 400 NMR spectrometer. Powder X-ray diffraction (PXRD) data were collected using a D8 ADVANCE X-ray with Cu  $K\alpha$  radiation ( $\lambda = 1.05405 \text{ \AA}$ ). Fourier Transform Infrared (FT-IR) spectra in the region of  $800\text{-}4000 \text{ cm}^{-1}$  were obtained with a Perkin-Elmer 1600 FT-IR spectrometer. Thermogravimetric analysis (TGA) was performed on a TA Instrument Q5 analyzer with the temperature ranging from  $20$  to  $800 \text{ }^\circ\text{C}$  under nitrogen and a heating rate of  $10 \text{ }^\circ\text{C}/\text{min}$ . Scanning electron microscopy (SEM) images of the BDF-TAPT-COF material were carried out on a SUB010 scanning electron microscope with acceleration voltage of  $20 \text{ kV}$  and the transmission electron microscopy (TEM) analysis was performed on a JEOL 2100 Electron Microscope with an operating voltage of  $200 \text{ kV}$ . Solid state  $^{13}\text{C}$  CP-MAS NMR spectrum was measured at  $125.69 \text{ MHz}$  using a  $4 \text{ mm}$  MAS NMR probe with a spinning rate of  $8 \text{ kHz}$ . Solid state UV-Vis spectra were recorded on a Cary 5000 UV-Vis spectrophotometer (Varian, USA). Time-resolved photoluminescence spectroscopy was measured by time-correlated single photon counting (Hamamatsu photonics, Quantaaurus-Tau) with laser ( $470 \text{ nm}$ ) as the excitation light source.  $\text{N}_2$  adsorption measurements were performed using an ASAP 2020/TriStar 3000 (Micromeritics) apparatus at  $77 \text{ K}$ , the samples were degassed under high vacuum at  $120 \text{ }^\circ\text{C}$  for  $8 \text{ h}$  before analysis.

### Photoelectrochemical measurements

Cyclic voltammetry (CV) measurements were performed on a CHI 660E in a three-electrode electrochemical cell equipped with a salt bridge and a scan rate of  $100 \text{ mVs}^{-1}$ . The photocurrent measurements were conducted on a workstation in a standard three-electrode system in dark and light excitation at  $-0.14 \text{ V}$  vs.  $\text{Ag}/\text{AgCl}$  with the photocatalyst-coated FTO as the working electrode, Pt plate as the counter electrode and  $\text{Ag}/\text{AgCl}$  as the reference electrode by directly irradiating the working electrode from the back side using a  $300\text{W}$  Xenon lamp with AM 1.5 cut-off filter, and  $2\text{M}$   $\text{Na}_2\text{SO}_4$  aqueous solution was used as the electrolyte. Electrochemical impedance spectroscopy (EIS) analysis was performed at the open circuit condition at  $-0.14 \text{ V}$  vs.  $\text{Ag}/\text{AgCl}$  in the frequency range of  $0.01$  to  $10000 \text{ Hz}$  with an AC amplitude of  $10 \text{ mV}$ .

### Synthetic procedures

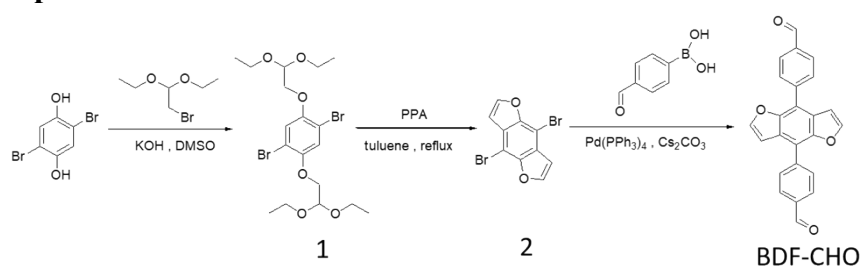

**Scheme S1** Synthetic routes for the building unit of 4,4'-(benzo[1,2-b:4,5-b']difuran-4,8-diyl)dibenzaldehyde (BDF-CHO).

**1,4-dibromo-2,5-bis(2,2-diethoxyethoxy)benzene (1):** In a  $250 \text{ mL}$  round-bottom flask, a mixture of 2,5-dibromobenzene-1,4-diol ( $5.0 \text{ g}$ ,  $18.7 \text{ mmol}$ ), potassium

hydroxide (2.6 g, 46.7 mmol) and 150 mL DMSO was stirred at 40°C for 8h under N<sub>2</sub> atmosphere. Afterwards, 2-bromo-1,1-diethoxyethane (8.1g, 41mmol) was added into the mixture and heated at 80°C for another 18h. After cooling down to room temperature, the reaction mixture was poured into ice/water mixture and extracted by dichloromethane, the organic phase was combined and dried over MgSO<sub>4</sub> followed by the removal of the solvent in vacuo. The residue was purified with flash column chromatography on silica gel eluted with dichloromethane and subsequently recrystallized from ethanol to get white solid (4.6 g, yield of ca. 49%). <sup>1</sup>H NMR: δH (400 MHz, CDCl<sub>3</sub>) 7.15(1H, s), 4.84(1H, t, J 5.2), 3.99(2H, d, J 5.2), 3.85-3.60(4H, m), 1.25(6H, t, J 7.0).

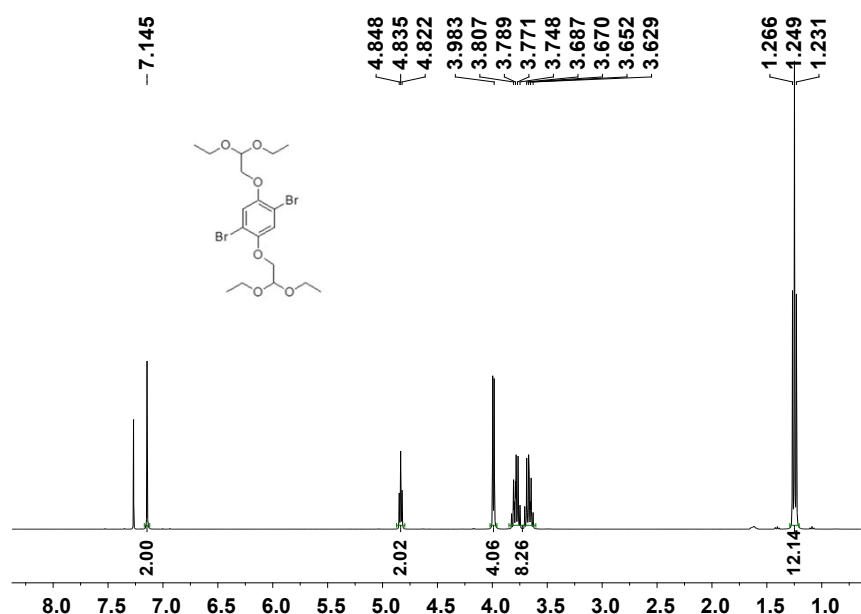

Fig. S1 <sup>1</sup>H NMR spectrum of compound 1.

**4,8-dibromobenzo[1,2-b:4,5-b']difuran (2):** A 250 mL round-bottom flask was charged with 1,4-dibromo-2,5-bis(2,2-diethoxyethoxy)benzene (1) (10.0 g, 20 mmol), polyphosphoric acid (PPA, 15 g) and toluene (100 mL), the mixture was heated at 100 °C for 5h. After cooling down to room temperature, the mixture was poured into 250 mL of 2M NaOH aqueous solution, which was extracted with dichloromethane, washed with water, dried over MgSO<sub>4</sub> and evaporated under vacuum. The crude product was obtained by column chromatography on silica gel eluted with petroleum ether: dichloromethane (10:1, v/v) and recrystallized from ethanol to get white solid (2.1 g, 33%). <sup>1</sup>H NMR: δH (400 MHz, CDCl<sub>3</sub>) δ (ppm): 7.76 (2H, d, J 2.0), 6.98 (2H, d, J 2.0).

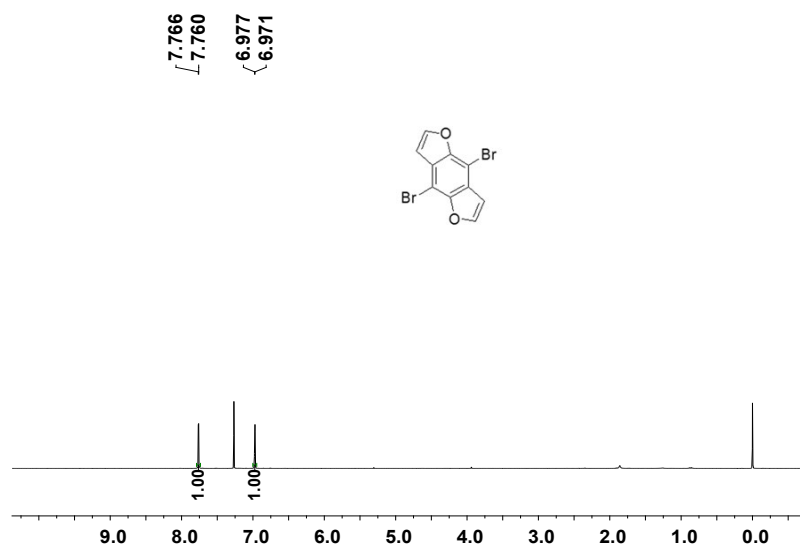

**Fig. S2** <sup>1</sup>H NMR spectrum of compound 2.

**4,4'-(benzo[1,2-b:4,5-b']difuran-4,8-diyl)dibenzaldehyde (BDF-CHO):** To a stirring solution of compound 2 (3.2 g, 10 mmol), Pd(PPh<sub>3</sub>)<sub>4</sub> (580 mg, 0.5 mmol) and 4-formylphenylboronic acid (3.7 g, 25 mmol) in the mixture of toluene (75 mL) and methanol (50 mL) was added 25 mL 2M CsCO<sub>3</sub> aqueous solution, which was degassed by N<sub>2</sub> bubbling in advance. After reflux for 24h under N<sub>2</sub>, the mixture was poured into distilled water, extracted with chloroform, dried over MgSO<sub>4</sub> and evaporated under reduced pressure, giving the crude compound which was further purified by flash chromatography with dichloromethane as eluent and recrystallized from ethanol to afford the title product as a yellowish green powder (2.2 g, 60%). <sup>1</sup>H NMR: δH (400 MHz, CDCl<sub>3</sub>) δ (ppm): 10.14 (1 H, s), 8.08 (4H, q, J8.4), 7.78 (1 H, d, J2.2), 7.06 (1H, d, J2.3).

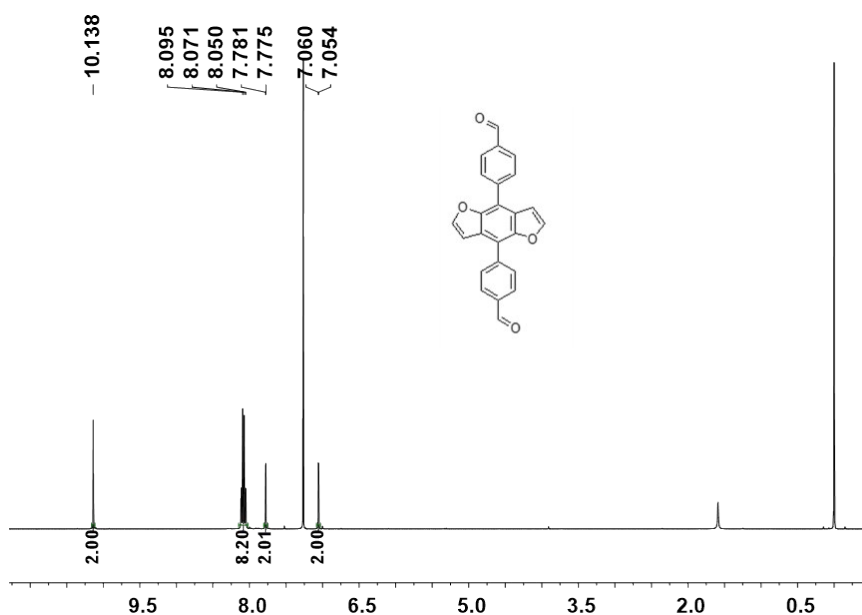

**Fig. S3** <sup>1</sup>H NMR spectrum of BDF-CHO.

**Synthesis of BDF-TAPT-COF.** A Pyrex tube was charged with BDF-CHO (27.5 mg, 0.75mmol), 1,3,5-tris-(4aminophenyl)triazine (TAPT, 17.7 mg, 0.05 mmol), 0.5 mL o-dichlorobenzene and 1.5 mL n-BuOH, and then the mixture was sonicated for 10 min, followed by slow addition of 0.2 mL of 3M aqueous acetic acid. Afterwards, the tube was flash frozen at 77 K and degassed by three freeze-pump-thaw cycles, sealed under vacuum and heated at 120 °C for 3 days. After cooling down to room temperature, the tube was open and the resulting precipitate was filtered off, thoroughly washed THF, methanol and acetone until the filtrate was colorless, and Soxhlet extractions with tetrahydrofuran and dichloromethane for 24h, respectively. Finally, the resulting yellow powder was dried under vacuum at 120 °C overnight to give the **BDF-TAPT-COF** activated sample.

### Details of the Photocatalysis experiments

#### Photocatalytic H<sub>2</sub> evolution experiment

The photocatalytic hydrogen evolution reactions were performed in a top-irradiation quartz vessel which was connected with an online glass closed gas circulation system (Labsolar-6A, Beijing Perfectlight). For a typical H<sub>2</sub> evolution experiment, the quartz vessel was charged with the activated COF powder (10 mg), 0.1 M ascorbic acid water solution (50 mL) and hexachloroplatinic acid solution as the platinum precursor. The solution was then thoroughly degassed and irradiated using a Microsolar300 Xe lamp (Beijing Perfectlight) with a cut-off filter of AM 1.5 was used as light sources. The H<sub>2</sub> was analyzed by gas chromatography (Fuli, 9790 II (PLF-01)) equipped with a thermal conductive detector (TCD) and a 5 Å molecular sieve column with argon as the carrier gas. After the photocatalysis experiments, the COF material was recovered by washing with water and acetone then dried under vacuum at 120 °C for multiple runs.

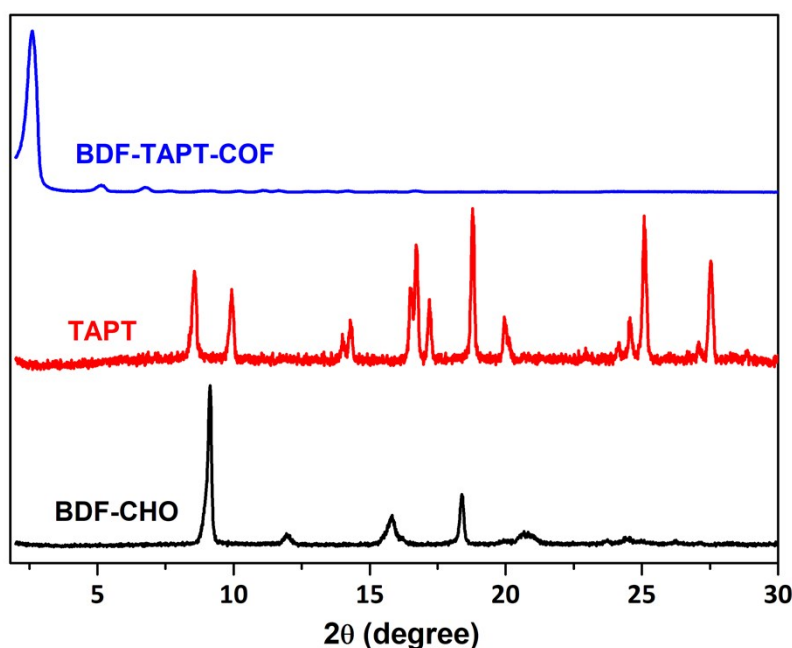

**Fig. S4** PXRD patterns of BDF-CHO (black), TAPT (red) and **BDF-TAPT-COF** (blue).

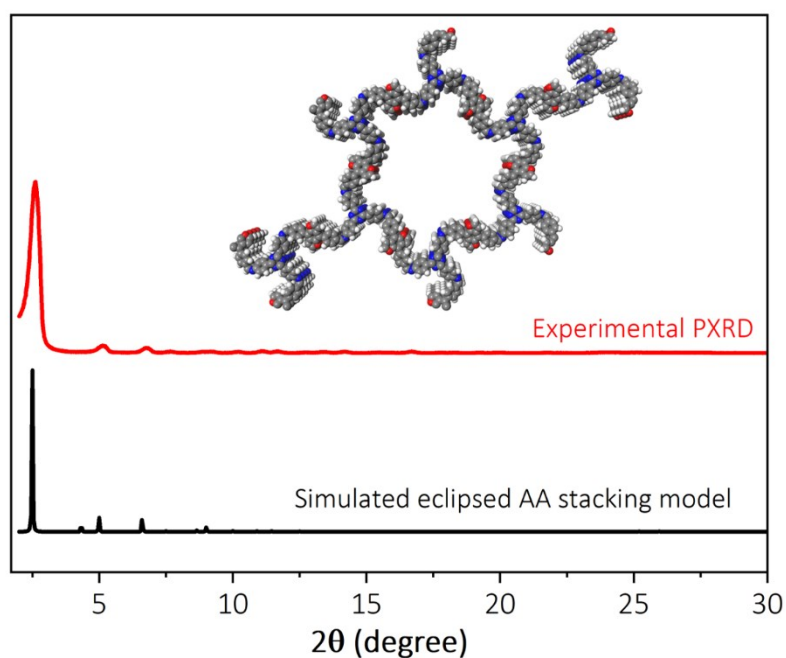

**Fig. S5** Comparison of the experimental (red) and simulated AA stacking PXRD (black) patterns of **BDF-TAPT-COF** and the top view of the simulated structure of AA stacking.

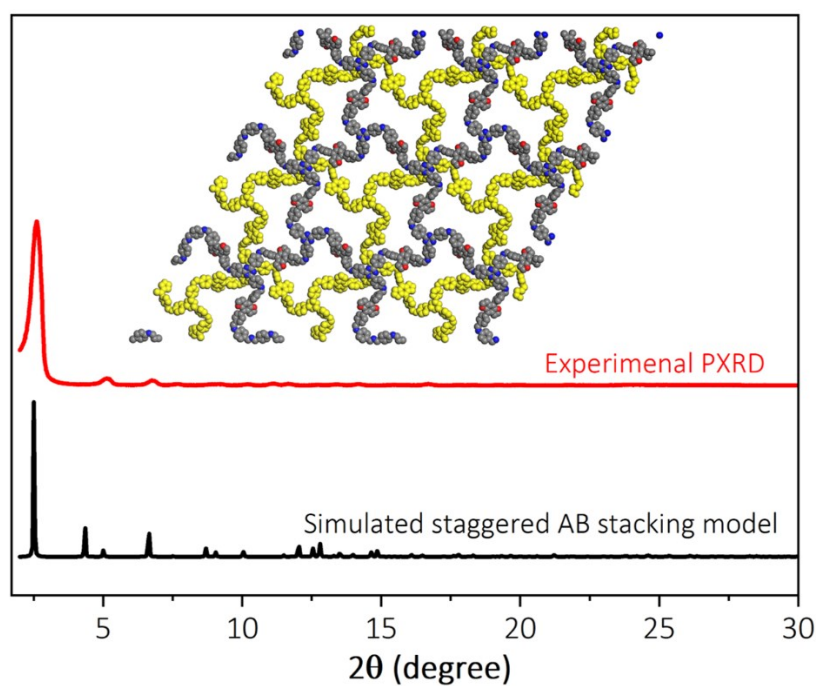

**Fig. S6** Comparison of the experimental (red) and simulated AB stacking PXRD (black) patterns of **BDF-TAPT-COF** and the top view of the simulated structure of AB stacking.

**Table S1** Atomistic coordinates for the AA stacking mode of **BDF-TAPT-COF** optimized using Forcite method.

| Space group: <i>P3</i><br>$a = b = 40.8575 \text{ \AA}$ , $c = 3.6603 \text{ \AA}$<br>$\alpha = \beta = 90.0^\circ$ , $\gamma = 120.0^\circ$ |                                 |         |         |
|----------------------------------------------------------------------------------------------------------------------------------------------|---------------------------------|---------|---------|
| Pawley refinement                                                                                                                            | $R_{wp}=10.68\%$ , $R_p=6.43\%$ |         |         |
| C1                                                                                                                                           | 0.37055                         | 0.67775 | 0.91886 |
| C2                                                                                                                                           | 0.4215                          | 0.66823 | 0.61545 |
| C3                                                                                                                                           | 0.45947                         | 0.68195 | 0.52733 |
| C4                                                                                                                                           | 0.48799                         | 0.71637 | 0.67037 |
| C5                                                                                                                                           | 0.47758                         | 0.73884 | 0.86917 |
| C6                                                                                                                                           | 0.43949                         | 0.72672 | 0.93523 |
| C7                                                                                                                                           | 0.4111                          | 0.69083 | 0.81861 |
| C8                                                                                                                                           | 0.55047                         | 0.72288 | 0.46323 |
| N9                                                                                                                                           | 0.52644                         | 0.7341  | 0.54308 |
| C10                                                                                                                                          | 0.51547                         | 0.65581 | 0.7036  |
| C11                                                                                                                                          | 0.50946                         | 0.6194  | 0.70354 |
| C12                                                                                                                                          | 0.53571                         | 0.61133 | 0.54741 |
| C13                                                                                                                                          | 0.56862                         | 0.64054 | 0.38795 |
| C14                                                                                                                                          | 0.57348                         | 0.6771  | 0.36874 |
| C15                                                                                                                                          | 0.54588                         | 0.68468 | 0.51443 |
| C16                                                                                                                                          | 0.55533                         | 0.56367 | 0.67584 |
| C17                                                                                                                                          | 0.54755                         | 0.52664 | 0.69994 |
| C18                                                                                                                                          | 0.51266                         | 0.49549 | 0.58749 |
| C19                                                                                                                                          | 0.48565                         | 0.50484 | 0.46514 |
| C20                                                                                                                                          | 0.49297                         | 0.5415  | 0.45784 |
| C21                                                                                                                                          | 0.52819                         | 0.57235 | 0.55514 |
| C22                                                                                                                                          | 0.46803                         | 0.42501 | 0.57375 |
| C23                                                                                                                                          | 0.4601                          | 0.38918 | 0.45496 |
| C24                                                                                                                                          | 0.48908                         | 0.38294 | 0.32988 |
| C25                                                                                                                                          | 0.52642                         | 0.41279 | 0.35899 |
| C26                                                                                                                                          | 0.53436                         | 0.4486  | 0.46604 |
| C27                                                                                                                                          | 0.50523                         | 0.45588 | 0.55764 |
| N28                                                                                                                                          | 0.49616                         | 0.33032 | 0.04985 |
| C29                                                                                                                                          | 0.47756                         | 0.34807 | 0.11079 |
| C30                                                                                                                                          | 0.53033                         | 0.30625 | 0.38322 |
| C31                                                                                                                                          | 0.56349                         | 0.30526 | 0.44777 |
| C32                                                                                                                                          | 0.5981                          | 0.33479 | 0.32    |
| C33                                                                                                                                          | 0.59897                         | 0.36435 | 0.11865 |

|     |         |         |          |
|-----|---------|---------|----------|
| C34 | 0.56549 | 0.3642  | 0.04303  |
| C35 | 0.53129 | 0.33622 | 0.19066  |
| C36 | 0.63324 | 0.33424 | 0.37599  |
| O37 | 0.59134 | 0.58911 | 0.80716  |
| C38 | 0.60534 | 0.56546 | 0.9147   |
| C39 | 0.58096 | 0.52908 | 0.8606   |
| N40 | 0.29567 | 0.65549 | 0.77623  |
| N41 | 0.66632 | 0.36723 | 0.3671   |
| H42 | 0.40036 | 0.64112 | 0.50582  |
| H43 | 0.46662 | 0.66663 | 0.33435  |
| H44 | 0.49958 | 0.76589 | 0.97292  |
| H45 | 0.43211 | 0.74489 | 1.08659  |
| H46 | 0.57714 | 0.74435 | 0.35193  |
| H47 | 0.49636 | 0.66069 | 0.86198  |
| H48 | 0.48443 | 0.59773 | 0.83497  |
| H49 | 0.58917 | 0.63427 | 0.26367  |
| H50 | 0.59777 | 0.69918 | 0.22484  |
| H51 | 0.4446  | 0.429   | 0.65623  |
| H52 | 0.43086 | 0.36686 | 0.43968  |
| H53 | 0.55004 | 0.41056 | 0.27499  |
| H54 | 0.56333 | 0.47091 | 0.45029  |
| H55 | 0.44996 | 0.33599 | -0.01395 |
| H56 | 0.50338 | 0.28372 | 0.47892  |
| H57 | 0.56238 | 0.28184 | 0.59973  |
| H58 | 0.62497 | 0.38473 | -0.01533 |
| H59 | 0.56577 | 0.38415 | -0.15294 |
| H60 | 0.63294 | 0.57579 | 1.03511  |
| H61 | 0.58569 | 0.50647 | 0.94296  |
| O62 | 0.4505  | 0.4799  | 0.31717  |
| C63 | 0.43587 | 0.5037  | 0.23374  |
| C64 | 0.45931 | 0.53959 | 0.31398  |
| H65 | 0.40792 | 0.49386 | 0.12149  |
| H66 | 0.45271 | 0.56191 | 0.29139  |



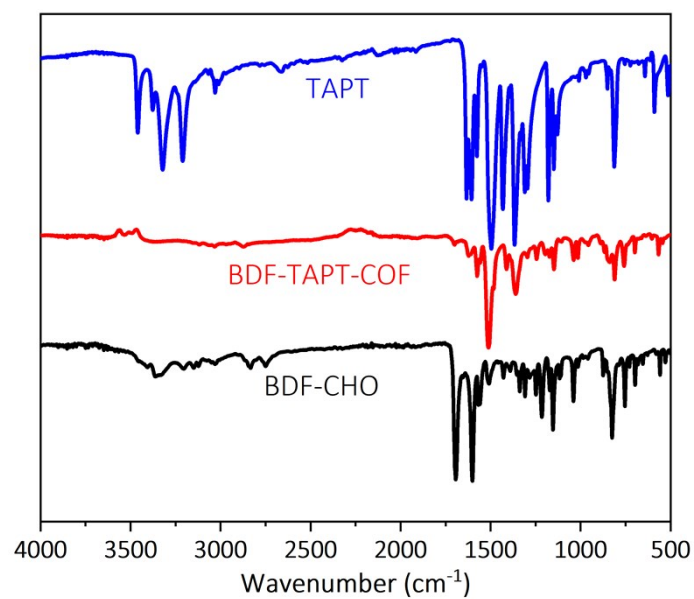

**Fig. S7** FT-IR spectra of BDF-CHO (black), TAPT (blue) and **BDF-TAPT-COF** (red).

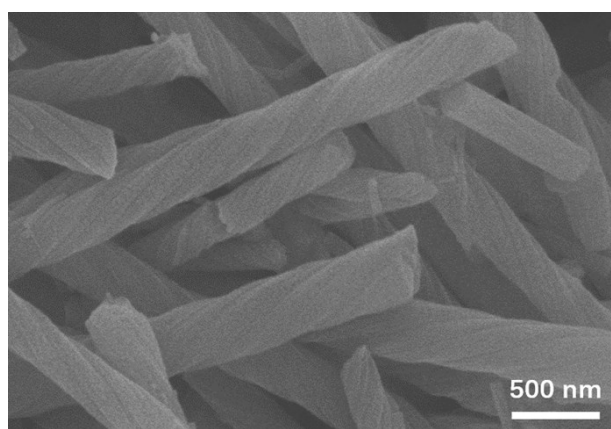

**Fig. S8** Scanning electron microscopy (SEM) image of **BDF-TAPT-COF**.

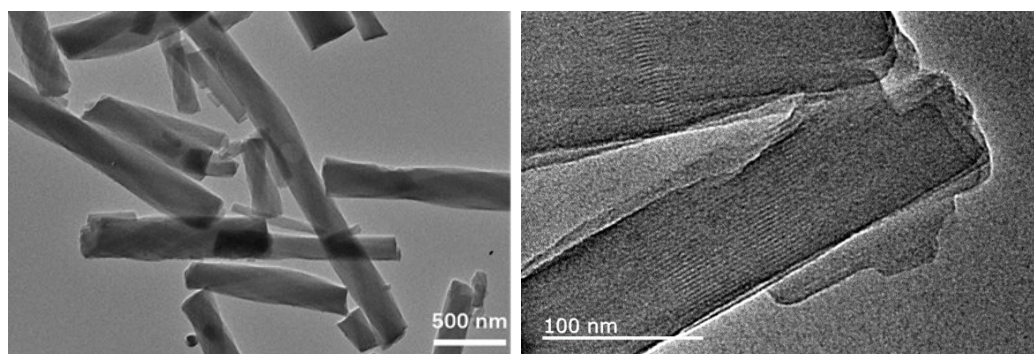

**Fig. S9** Transmission electron microscopy (TEM) images of **BDF-TAPT-COF**.

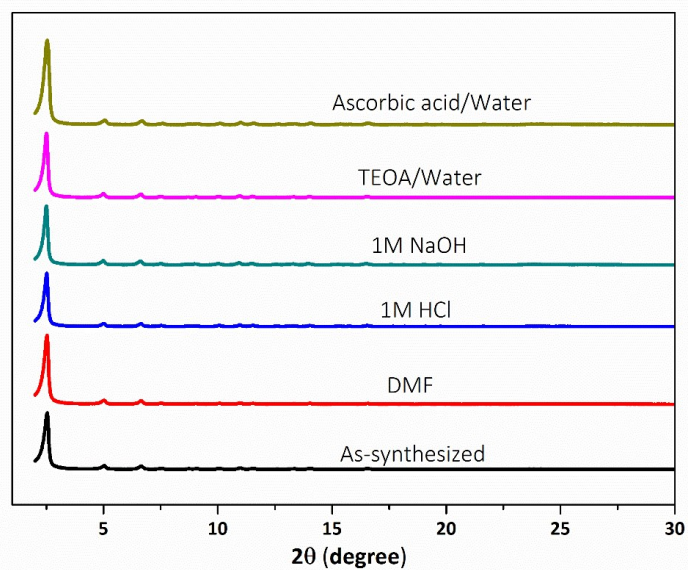

**Fig. S10** Comparison of the PXRD patterns of **BDF-TAPT-COF** after immersing in different solvent for 7 days.

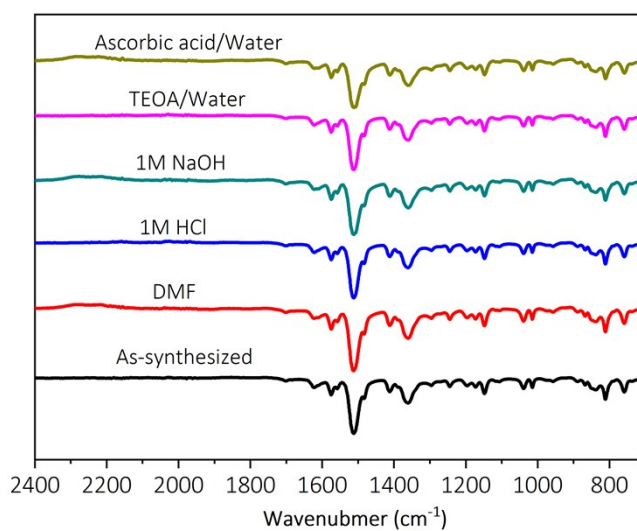

**Fig. S11** Comparison of the FT-IR spectra of **BDF-TAPT-COF** after immersing in different solvents for 7 days.

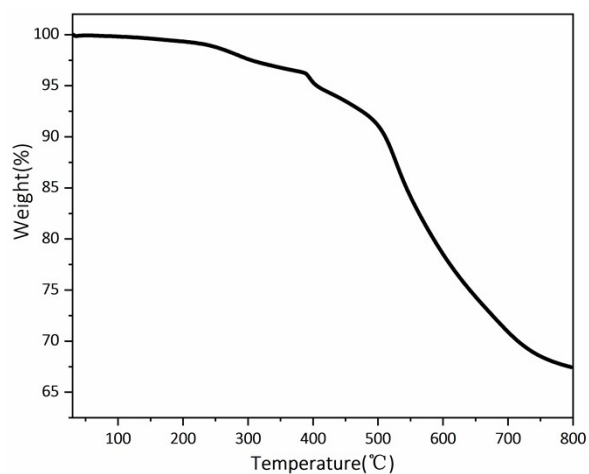

**Fig. S12** Thermogravimetric analysis (TGA) curve of **BDF-TAPT-COF** measured under nitrogen flow with a heating rate 10 °C/min up to 800 °C.

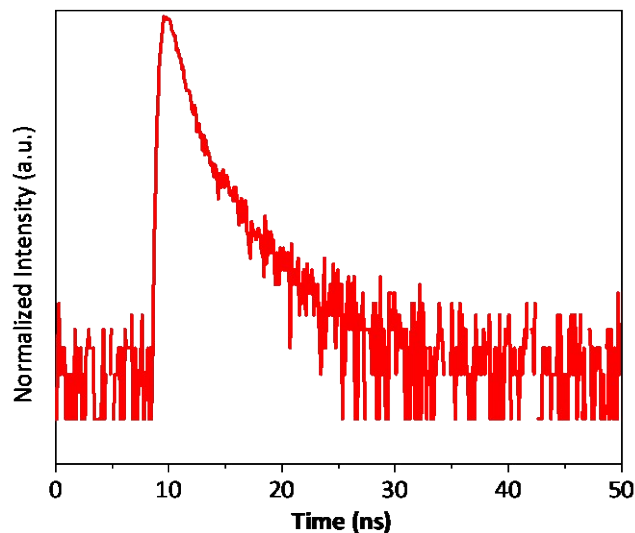

**Fig. S13** Time-resolved photoluminescence spectrum of the **BDF-TAPT-COF** (excitation at 470 nm).

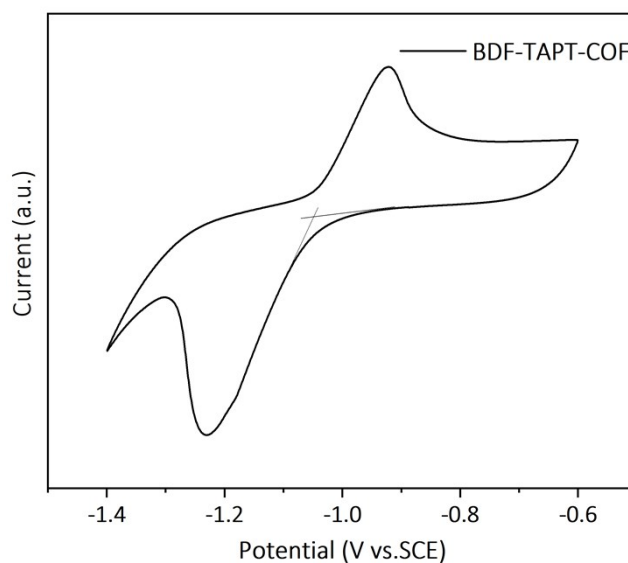

**Fig. S14** Cyclic voltammetry plot of **BDF-TAPT-COF** referenced to saturated calomel (SCE) using ferrocene ( $F_c$ ) as an internal standard at a scan rate of 100 mV S<sup>-1</sup>.

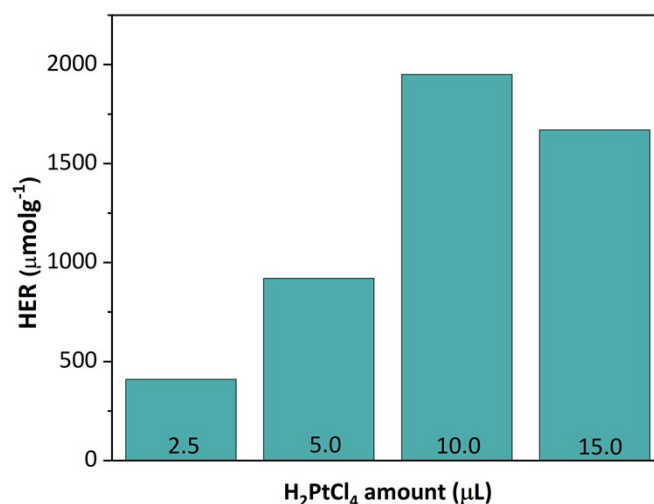

**Fig. S15** Hydrogen evolution rate versus the amount of the co-catalyst (10 mg BDF-TAPT-COF, different volumes of the H<sub>2</sub>PtCl<sub>4</sub> precursor in 2h under AM 1.5 irradiation).

The photocatalytic hydrogen evolution rate in 2h gradually enhanced with the increase of the amount of the Pt precursor and reached the maximum when 10 μL H<sub>2</sub>PtCl<sub>6</sub> (8 wt%) was introduced, thus, the detailed photocatalytic reactions were performed under this optimized condition.

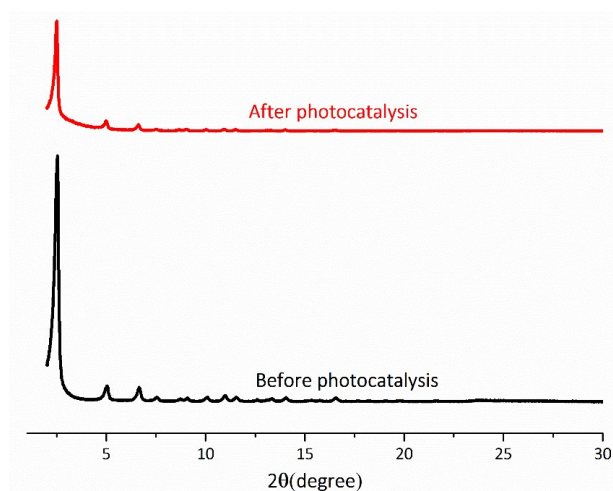

**Fig. S16** PXRD patterns of BDF-TAPT-COF before and after photocatalytic hydrogen evolution reactions.

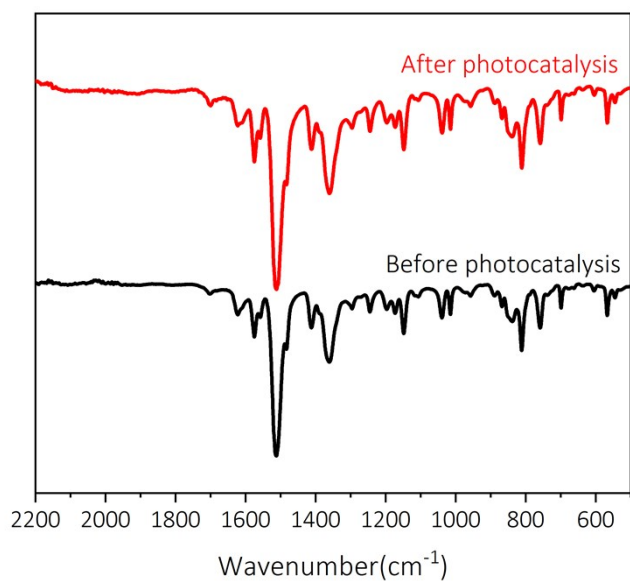

**Fig. S17** FT-IR spectra of **BDF-TAPT-COF** before and after photocatalytic hydrogen evolution reactions.

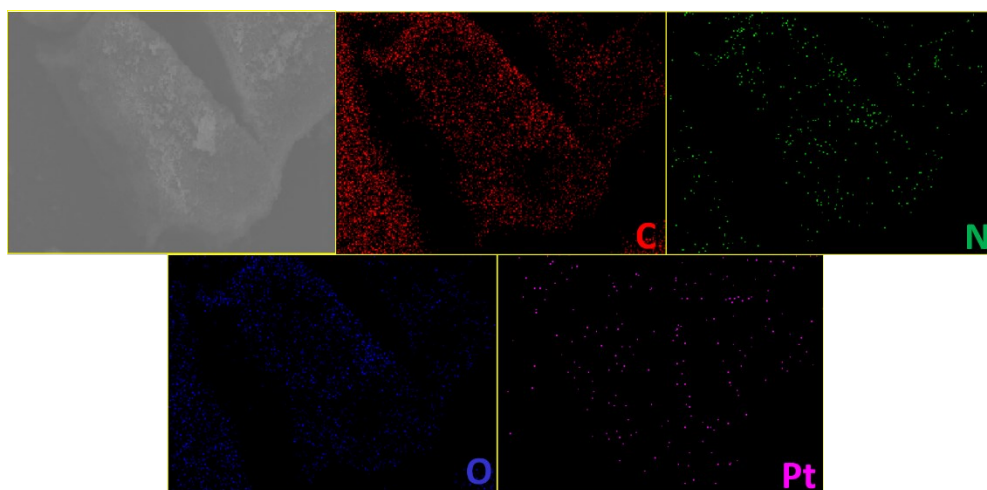

**Fig. S18** SEM and EDS mapping of the **BDF-TAPT-COF** photocatalysts.

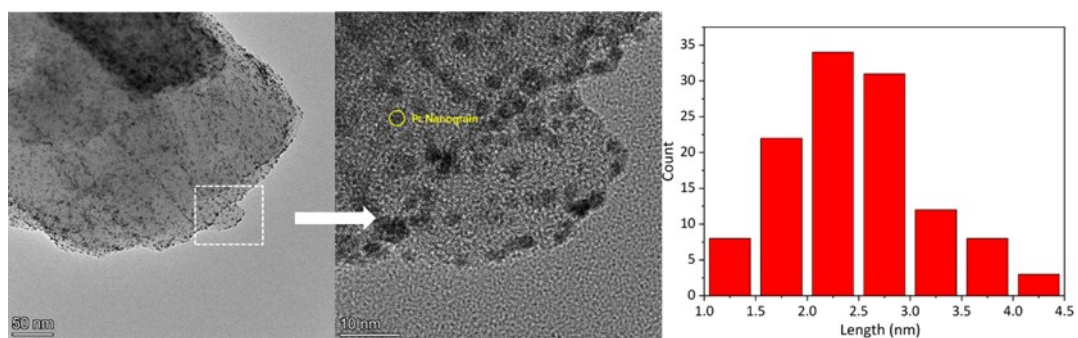

**Fig. S19.** TEM images of the **BDF-TAPT-COF** after photocatalysis and the corresponding diameter distribution of the Pt nanoparticles loaded on the COF material.

**Table S2** The summary of the photocatalytic H<sub>2</sub> evolution performance under visible-light irradiation over different types of CMPs and COFs.

| COFs                                  | Band gap (eV) | Co-catalyst       | Sacrificial agent               | HER ( $\mu\text{molg}^{-1}\text{h}^{-1}$ ) | AQY (%)                      | Ref. |
|---------------------------------------|---------------|-------------------|---------------------------------|--------------------------------------------|------------------------------|------|
| g-C <sub>40</sub> N <sub>3</sub> -COF | 2.36          | Pt                | Na <sub>2</sub> S               | 4                                          | -                            | 2    |
| TA-COF                                | 2.82          | Pt                | TEOA                            | 10                                         | -                            | 3    |
| g-C <sub>40</sub> N <sub>3</sub> -COF | 2.36          | Pt                | TEA                             | 12                                         | -                            | 2    |
| g-C <sub>40</sub> N <sub>3</sub> -COF | 2.36          | Pt                | Na <sub>2</sub> SO <sub>3</sub> | 14                                         | -                            | 2    |
| N <sub>0</sub> -COF                   | 2.6-2.7       | Pt                | TEOA                            | 23                                         | 0.0017 (500 nm) <sup>c</sup> | 4    |
| TpPa-2-COF                            | 2.52          | Pt                | Lactic acid                     | 28                                         | -                            | 5    |
| g-C <sub>40</sub> N <sub>3</sub> -COF | 2.36          | Pt                | EtOH                            | 56                                         | -                            | 2    |
| TpPa-2                                | 2.07          | Pt                | Sodium ascorbate                | 72.09                                      | -                            | 6    |
| BE-COF                                | 2.12          | Pt                | Ascorbic acid                   | 76.0                                       | -                            | 7    |
| TFA-COF                               | 2.40          | Pt                | TEOA                            | 80                                         | -                            | 3    |
| PTP-COF                               | 2.1           | Pt                | TEOA                            | 83.83                                      | -                            | 8    |
| N <sub>1</sub> -COF                   | 2.6-2.7       | Pt                | TEOA                            | 90                                         | 0.077 (450 nm) <sup>c</sup>  | 4    |
| N <sub>1</sub> -COF                   | -             | Co-1              | TEOA                            | 100                                        | -                            | 9    |
| CTP-1                                 | 2.96          | Pt                | TEOA                            | 120                                        | -                            | 10   |
| sp <sup>2</sup> c-CMP                 | 1.96          | Pt                | TEOA                            | 140                                        | -                            | 11   |
| TTR-COF                               | 2.71          | Au                | TEOA                            | 141                                        | -                            | 12   |
| TTB-COF                               | 2.8           | Au                | TEOA                            | 145.25                                     | -                            | 12   |
| N <sub>3</sub> -COF                   | -             | Co-1              | TEOA                            | 163                                        | -                            | 9    |
| OB-POP-1                              | 2.21          | Pt                | TEOA                            | 168                                        | -                            | 13   |
| CTF-1                                 | 2.23          | Pt                | TEOA                            | 168                                        | -                            | 14   |
| B-CTF-1                               | 2.14          | Pt                | TEOA                            | 179                                        | -                            | 14   |
| TpPa-COF-NO <sub>2</sub>              | 1.92          | Pt                | Sodium ascorbate                | 220                                        | -                            | 15   |
| COF-42                                | -             | Co-1              | TEOA                            | 233                                        | -                            | 9    |
| TP-BDDA                               | 2.31          | Pt                | TEOA                            | 324 ± 10                                   | 1.8 (520 nm) <sup>d</sup>    | 16   |
| CTF-15                                | 2.58          | Pt                | TEA                             | 352                                        | 15.9 (420 nm) <sup>e</sup>   | 17   |
| TBC-COF                               | -             | Pt                | TEOA                            | 360                                        | 0.87 (420 nm) <sup>d</sup>   | 14   |
| N <sub>2</sub> -COF                   | -             | Co-2 <sup>b</sup> | TEOA                            | 414                                        | -                            | 9    |
| PyTA-BC-Ph                            | 2.67          |                   | ascorbic acid                   | 417                                        | 1.83(420nm)                  | 18   |
| N <sub>2</sub> -COF                   | 2.6-2.7       | Pt                | TEOA                            | 438                                        | 0.19 (450 nm) <sup>c</sup>   | 4    |
| CTP <sub>300</sub>                    | 2.36          | Pt                | TEOA                            | 500                                        | 2.4 (405 nm)                 | 10   |
| BtCOF150                              | 2.10          | Pt                | TEOA                            | 750±25                                     | 0.2(420nm)                   | 19   |
| N <sub>2</sub> -COF                   | -             | Co-1 <sup>a</sup> | TEOA                            | 782                                        | 0.16 <sup>d</sup>            | 9    |
| OB-POP-2                              | 2.28          | Pt                | TEOA                            | 940                                        | -                            | 13   |
| TpDTz COF                             | 2.07          | NiME              | TEOA                            | 941                                        | 0.2 (400 nm) <sup>d</sup>    | 20   |
| CTF-1-10min                           | 2.26          | Pt                | TEOA                            | 1072                                       | 9.2 (450 nm) <sup>d</sup>    | 21   |

|                                                          |         |                     |                  |             |                            |    |
|----------------------------------------------------------|---------|---------------------|------------------|-------------|----------------------------|----|
| CTF-Th                                                   | 2.38    | Pt                  | TEOA             | 1100        | -                          | 22 |
| OB-POP-4                                                 | 2.37    | Pt                  | TEOA             | 1114        | -                          | 13 |
| PyTA-BC                                                  | 2.71    |                     | ascorbic acid    | 1183        | 1.46(420nm)                | 18 |
| TpPa-1-COF                                               | 2.02    | Pt                  | Sodium ascorbate | 1223        | -                          | 23 |
| OB-POP-3                                                 | 2.14    | Pt                  | TEOA             | 1322        | 2.0 (420 nm)               | 13 |
| sp <sup>2</sup> c-COF                                    | 1.9     | Pt                  | TEOA             | 1360        | -                          | 11 |
| CTF-O                                                    | 2.67    | Pt                  | TEOA             | 1440        | 2.10 (420 nm)              | 24 |
| CTF-HUST-1                                               | 2.03    | Pt                  | TEOA             | 1540        | -                          | 25 |
| TpPa-COF                                                 | 2.09    | Pt                  | Sodium ascorbate | 1560        | -                          | 15 |
| TP-COF                                                   | 2.28    | Pt                  | Ascorbic acid    | 1600 (±80)  | -                          | 26 |
| N <sub>3</sub> -COF                                      | 2.6-2.7 | Pt                  | TEOA             | 1703        | 0.44 (450 nm) <sup>e</sup> | 4  |
| CTF-BT                                                   | 2.51    | Pt                  | TEOA             | 1800        | -                          | 22 |
| Ni(OH) <sub>2</sub> -<br>2.5%/TpPa-2                     | -       | Ni(OH) <sub>2</sub> | Sodium ascorbate | 1895.99     | -                          | 6  |
| TFPT-COF                                                 | 2.8     | Pt                  | TEOA             | 1970        | 2.2 (400 nm) <sup>f</sup>  | 27 |
| CTFS <sub>10</sub>                                       | 1.87    | Pt                  | TEOA             | 2000        | -                          | 28 |
| PyTz-COF                                                 | 2.20    | Pt                  | Ascorbic acid    | 2072.4      |                            | 29 |
| sp <sup>2</sup> c-COF <sub>ERDN</sub>                    | 1.85    | Pt                  | TEOA             | 2120        | 0.48 (495 nm)              | 11 |
| g-C <sub>54</sub> N <sub>6</sub> -COF                    | 2.03    | Pt                  | TEOA             | 2518.9      |                            | 30 |
| g-C <sub>40</sub> N <sub>3</sub> -COF                    | 2.36    | Pt                  | TEOA             | 2596        | 4.84(±0.27)<br>(420 nm)    | 2  |
| Py-FTP-BT-<br>COF                                        | 2.34    | Pt                  | Ascorbic acid    | 2875        |                            | 31 |
| TpPa-COF-<br>CH <sub>3</sub>                             | 2.10    | Pt                  | Sodium ascorbate | 3070        | -                          | 15 |
| α-Fe <sub>2</sub> O <sub>3</sub> /TpPa-<br>2-COF (3 : 7) | 2.07    | Pt                  | sodium ascorbate | 3770        | 0.137(450nm)               | 32 |
| CdS-<br>COF(90:10)                                       | -       | Pt                  | Lactic acid      | 3678        | 4.2 (420 nm)               | 5  |
| S-COF                                                    | 2.10    | Pt                  | Ascorbic acid    | 4440 (±140) | -                          | 26 |
| CTF-S                                                    | 2.47    | Pt                  | TEOA             | 5320        | 4.11 (420 nm)              | 24 |
| TpPa-1                                                   | 2.11    | Pt                  | Ascorbic acid    | 5479        | -                          | 33 |
| MoS <sub>2</sub> -<br>3%/TpPa-1-<br>COF                  | 2.14    | MoS <sub>2</sub>    | Ascorbic acid    | 5585        | 0.76 (420 nm) <sup>d</sup> | 33 |
| CTF-HS <sub>0.75</sub> -1                                | 2.70    | Pt                  | TEOA             | 6040        | 4.2 (420 nm)               | 25 |
| CTF-BT/Th-1                                              | 2.51    | Pt                  | TEOA             | 6606        | 7.3(420 nm) <sup>d</sup>   | 22 |
| CTF-HS <sub>0.75</sub> -2                                | -       | Pt                  | TEOA             | 7100        | 6.8 (420 nm)               | 25 |
| TpPa-COF-<br>(CH <sub>3</sub> ) <sub>2</sub>             | 2.06    | Pt                  | Sodium ascorbate | 8330        | -                          | 15 |
| TP-COF                                                   | 1.97    | PVP-Pt              | Ascorbic acid    | 8420        | 0.4 (475 nm) <sup>d</sup>  | 7  |
| Py-CITP-BT-<br>COF                                       | 2.36    | Pt                  | Ascorbic acid    | 8875        | 8.45(420nm)                | 31 |
| CTF-CBZ                                                  | 2.17    | Pt                  | TEOA             | 9920        | 4.07 (420 nm)              | 34 |

|                                         |      |                                          |                  |              |                            |    |
|-----------------------------------------|------|------------------------------------------|------------------|--------------|----------------------------|----|
| CN-COF                                  | 2.09 | Pt                                       | TEOA             | 10100        | 20.7 (425 nm) <sup>d</sup> | 35 |
| Pd <sup>0</sup> /TpPa-1-EosinY          | -    | -                                        | TEOA             | 10400        | -                          | 36 |
| CTF-N                                   | 2.17 | Pt                                       | TEOA             | 10760        | 4.07 (420 nm)              | 24 |
| TiO <sub>2</sub> -TpPa-1-COF (1:3)      | 2.15 | Pt                                       | sodium ascorbate | 11190        | 7.6(420nm)                 | 37 |
| 20%CdS-CTF-1                            | -    | Pt                                       | Lactic acid      | 11430        | 16.3 (420 nm)              | 38 |
| CdS NPs/3%CTF-1                         | 2.36 | Pt                                       | Lactic acid      | 12150        | -                          | 39 |
| Mo <sub>3</sub> S <sub>13</sub> @EB-COF | -    | Ru(bpy) <sub>3</sub> C<br>I <sub>2</sub> | Ascorbic acid    | 13215        | 4.49 (475 nm) <sup>d</sup> | 40 |
| ter-CTF-0.7                             | 2.11 | Pt                                       | TEOA             | 19320        | 22.8 (420 nm)              | 34 |
| NH <sub>2</sub> -UiO-66/TpPa-1-COF(4:6) | 2.10 | Pt                                       | Sodium ascorbate | 23413        | -                          | 23 |
| FS-COF                                  | 1.85 | Pt                                       | Ascorbic acid    | 10100 (±300) | 3.2 (600 nm) <sup>e</sup>  | 26 |
| rGO(5%)-TpPa-1-COF                      | 2.06 | Pt                                       | sodium ascorbate | 11980        | 7.53(450nm)                | 41 |
| FS-COF+WSSF                             | -    | Pt                                       | Ascorbic acid    | 16300 (±290) | 2.2 (600 nm) <sup>e</sup>  | 26 |
| Cu-salphen-HDCOF-NSs+FS                 | 1.62 |                                          | TEA              | 36990        | 5.77(420 nm)               | 42 |

<sup>a</sup>Co-1: [Co(dmgH)<sub>2</sub>pyCl]; <sup>b</sup>Co-2: [Co(dmgBF<sub>2</sub>)<sub>2</sub>(OH<sub>2</sub>)<sub>2</sub>]; <sup>c</sup>PE: Photonic efficiency; <sup>d</sup>AQE: apparent quantum efficiency; <sup>e</sup>EQE: external quantum efficiency; <sup>f</sup>QE: quantum efficiency; TEOA: Triethanolamine; TEA: Triethylamine.

## Reference

1. L. Bian, J. Hai, E. Zhu, J. Yu, Y. Liu, J. Zhou, G. Ge and W. Tang, *J. Mater. Chem. A*, 2015, **3**, 1920-1924.
2. S. Bi, C. Yang, W. Zhang, J. Xu, L. Liu, D. Wu, X. Wang, Y. Han, Q. Liang and F. Zhang, *Nat. Commun.*, 2019, **10**, 2467.
3. C. Liu, Y. Xiao, Q. Yang, Y. Wang, R. Lu, Y. Chen, C. Wang and H. Yan, *Appl. Surf. Sci.*, 2021, **537**.
4. V. S. Vyas, F. Haase, L. Stegbauer, G. Savasci, F. Podjaski, C. Ochsenfeld and B. V. Lotsch, *Nat. Commun.*, 2015, **6**, 8508.
5. J. Thote, H. B. Aiyappa, A. Deshpande, D. Díaz Díaz, S. Kurungot and R. Banerjee, *Chem. Eur. J.*, 2014, **20**, 15961-15965.
6. H. Dong, X.-B. Meng, X. Zhang, H.-L. Tang, J.-W. Liu, J.-H. Wang, J.-Z. Wei, F.-M. Zhang, L.-L. Bai and X.-J. Sun, *Chem. Eng. J.*, 2020, **379**, 122342.
7. J. Ming, A. Liu, J. Zhao, P. Zhang, H. Huang, H. Lin, Z. Xu, X. Zhang, X. Wang, J. Hofkens, M. B. J. Roeffaers and J. Long, *Angew. Chem. Int. Ed.*, 2019, **58**, 18290-18294.
8. F. Haase, T. Banerjee, G. Savasci, C. Ochsenfeld and B. V. Lotsch, *Faraday Discuss.*, 2017, **201**, 247-264.



9. T. Banerjee, F. Haase, G. Savasci, K. Gottschling, C. Ochsenfeld and B. V. Lotsch, *J. Am. Chem. Soc.*, 2017, **139**, 16228-16234.
10. Z.-A. Lan, Y. Fang, X. Chen and X. Wang, *Chem. Commun.*, 2019, **55**, 7756-7759.
11. E. Jin, Z. Lan, Q. Jiang, K. Geng, G. Li, X. Wang and D. Jiang, *Chem*, 2019, **5**, 1632-1647.
12. L. Y. Li, Z. M. Zhou, L. Y. Li, Z. Y. Zhuang, J. H. Bi, J. H. Chen, Y. Yu and J. G. Yu, *ACS Sustain. Chem. Eng.*, 2019, **7**, 18574-18581.
13. S. Bi, Z.-A. Lan, S. Paasch, W. Zhang, Y. He, C. Zhang, F. Liu, D. Wu, X. Zhuang, E. Brunner, X. Wang and F. Zhang, *Adv. Funct. Mater.*, 2017, **27**, 1703146.
14. F. Li, D. Wang, Q.-J. Xing, G. Zhou, S.-S. Liu, Y. Li, L.-L. Zheng, P. Ye and J.-P. Zou, *Appl. Catal. B: Environ.*, 2019, **243**, 621-628.
15. J.-L. Sheng, H. Dong, X.-B. Meng, H.-L. Tang, Y.-H. Yao, D.-Q. Liu, L.-L. Bai, F.-M. Zhang, J.-Z. Wei and X.-J. Sun, *ChemCatChem*, 2019, **11**, 2313-2319.
16. P. Pachfule, A. Acharjya, J. Roeser, T. Langenhahn, M. Schwarze, R. Schomäcker, A. Thomas and J. Schmidt, *J. Am. Chem. Soc.*, 2018, **140**, 1423-1427.
17. C. B. Meier, R. Clowes, E. Berardo, K. E. Jelfs, M. A. Zwijnenburg, R. S. Sprick and A. I. Cooper, *Chem. Mater.*, 2019, **31**, 8830-8838.
18. A. F. M. El-Mahdy, A. M. Elewa, S.-W. Huang, H.-H. Chou and S.-W. Kuo, *Adv. Opt. Mater.*, 2020, **8**.
19. S. Ghosh, A. Nakada, M. A. Springer, T. Kawaguchi, K. Suzuki, H. Kaji, I. Baburin, A. Kuc, T. Heine, H. Suzuki, R. Abe and S. Seki, *J. Am. Chem. Soc.*, 2020, **142**, 9752-9762.
20. B. P. Biswal, H. A. Vignolo-González, T. Banerjee, L. Grunenberg, G. Savasci, K. Gottschling, J. Nuss, C. Ochsenfeld and B. V. Lotsch, *J. Am. Chem. Soc.*, 2019, **141**, 11082-11092.
21. S. Kuecken, A. Acharjya, L. Zhi, M. Schwarze, R. Schomäcker and A. Thomas, *Chem. Commun.*, 2017, **53**, 5854-5857.
22. W. Huang, Q. He, Y. Hu and Y. Li, *Angew. Chem. Int. Ed.*, 2019, **58**, 8676-8680.
23. F.-M. Zhang, J.-L. Sheng, Z.-D. Yang, X.-J. Sun, H.-L. Tang, M. Lu, H. Dong, F.-C. Shen, J. Liu and Y.-Q. Lan, *Angew. Chem. Int. Ed.*, 2018, **57**, 12106-12110.
24. L. Guo, Y. Niu, H. Xu, Q. Li, S. Razzaque, Q. Huang, S. Jin and B. Tan, *J. Mater. Chem. A*, 2018, **6**, 19775-19781.
25. N. Wang, G. Cheng, L. Guo, B. Tan and S. Jin, *Adv. Funct. Mater.*, 2019, **0**, 1904781.
26. X. Wang, L. Chen, S. Y. Chong, M. A. Little, Y. Wu, W.-H. Zhu, R. Clowes, Y. Yan, M. A. Zwijnenburg, R. S. Sprick and A. I. Cooper, *Nat. Chem.*, 2018, **10**, 1180-1189.
27. L. Stegbauer, K. Schwinghammer and B. V. Lotsch, *Chem. Sci.*, 2014, **5**, 2789-2793.
28. L. Li, W. Fang, P. Zhang, J. Bi, Y. He, J. Wang and W. Su, *J. Mater. Chem. A*, 2016, **4**, 12402-12406.
29. W. Li, X. Huang, T. Zeng, Y. A. Liu, W. Hu, H. Yang, Y.-B. Zhang and K. Wen, *Angew. Chem. Int. Ed.*, 2020, **60**, 1869-1874.
30. J. Xu, C. Yang, S. Bi, W. Wang, Y. He, D. Wu, Q. Liang, X. Wang and F. Zhang, *Angew. Chem. Int. Ed.*, 2020, **59**, 23845-23853.
31. W. Chen, L. Wang, D. Mo, F. He, Z. Wen, X. Wu, H. Xu and L. Chen, *Angew. Chem. Int. Ed.*, 2020, **59**, 16902-16909.
32. Y.-P. Zhang, H.-L. Tang, H. Dong, M.-Y. Gao, C.-C. Li, X.-J. Sun, J.-Z. Wei, Y. Qu, Z.-J. Li and F.-M. Zhang, *J. Mater. Chem. A*, 2020, **8**, 4334-4340.

33. M. Y. Gao, C. C. Li, H. L. Tang, X. J. Sun, H. Dong and F. M. Zhang, *J. Mater. Chem. A*, 2019, **7**, 20193-20200.
34. L. Guo, Y. Niu, S. Razzaque, B. Tan and S. Jin, *ACS Catal.*, 2019, **9**, 9438-9445.
35. M. Luo, Q. Yang, K. Liu, H. Cao and H. Yan, *Chem. Commun.*, 2019, **55**, 5829-5832.
36. S.-Y. Ding, P.-L. Wang, G.-L. Yin, X. Zhang and G. Lu, *Int. J. Hydrogen Energ.*, 2019, **44**, 11872-11876.
37. C.-C. Li, M.-Y. Gao, X.-J. Sun, H.-L. Tang, H. Dong and F.-M. Zhang, *Appl. Catal. B: Environ.*, 2020, **266**.
38. D. Wang, H. Zeng, X. Xiong, M.-F. Wu, M. Xia, M. Xie, J.-P. Zou and S.-L. Luo, *Sci. Bull.*, 2020, **65**, 113-122.
39. D. Wang, X. Li, L.-L. Zheng, L.-M. Qin, S. Li, P. Ye, Y. Li and J.-P. Zou, *Nanoscale*, 2018, **10**, 19509-19516.
40. Y.-J. Cheng, R. Wang, S. Wang, X.-J. Xi, L.-F. Ma and S.-Q. Zang, *Chem. Commun.*, 2018, **54**, 13563-13566.
41. Y.-H. Yao, J. Li, H. Zhang, H.-L. Tang, L. Fang, G.-D. Niu, X.-J. Sun and F.-M. Zhang, *J. Mater. Chem. A*, 2020, **8**, 8949-8956.
42. Y. Zang, R. Wang, P.-P. Shao, X. Feng, S. Wang, S.-Q. Zang and T. C. W. Mak, *J. Mater. Chem. A*, 2020, **8**, 25094-25100.
